# Supplementary material
Source: PubMed Central journal article supplement (PMC6813000)
Supplement: JCM.01107-19-s0005.pdf [file JCM.01107-19-s0005.pdf]

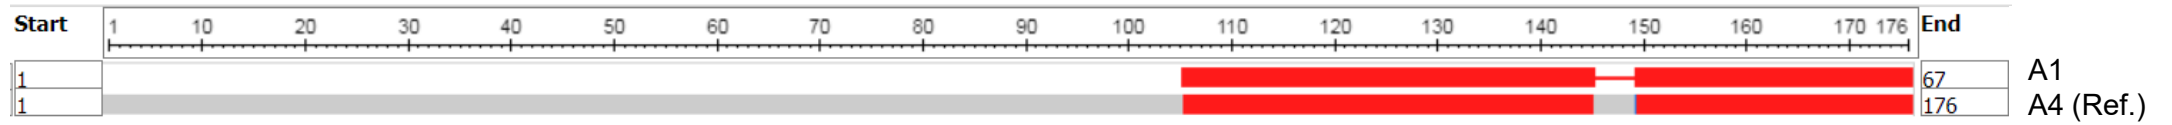

-----

1 MARRLPKPTLQGRLEADFPDSELLPKFQELNQNLPNDVFRQAQSYLVFLTSQFCYEEYVQRTFGVPRRQRAIDKRQRA 80

1 -----ASAGTGALASSAPSTAVAQSATPSVSSISSLRAATSGAT-----AAAAVDTGSGG 51

81 SVAGAGAHAHLGGSSATPVQQAQAAASAGTGALASSAPSTAVAQSATPSVSSISSLRAATSGATAAASAAAAVDTGSGG 160

52 GGQPHDTAPRGARKKQ 67

161 GGQPQDTAPRGARKKQ 176

**Supplementary Figure 1. Amino acid sequence alignment of the VCA-p18 (for assays A1 and A4, GenBank accession number: NC\_007605.1).** The sequence alignment was done using Protein BLAST (blast.ncbi.nlm.nih.gov). Red depicts the identical amino acid residues in all the sequences. Targeted antigen in assay A4 is the full length VCA-p18.

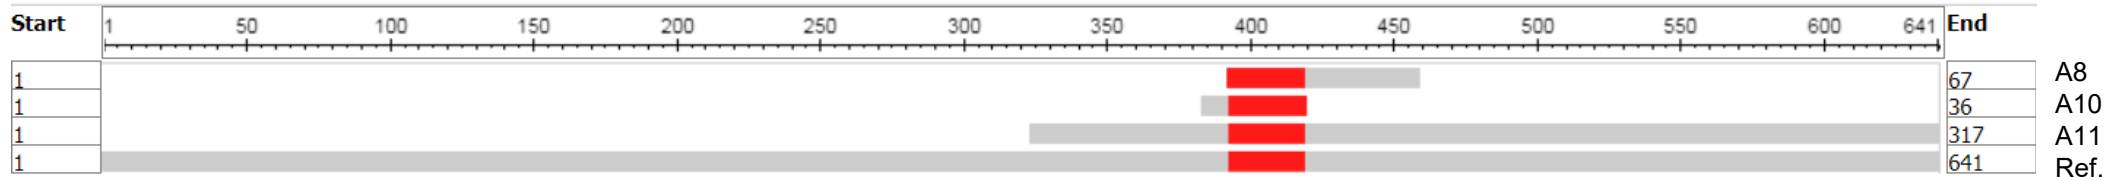

```

1      -----PPRRPP 6
1      -----SSQSSSSGSPPRRPP 15
1      GGGGRGRGGSGGRGRGGSGGRGRGGSGRRRGRGRERARGGSRERARGRGRGRGEKRPRSPSSQSSSSGSPPRRPP 75
1      [ 324 ]GGGGRGRGGSGGRGRGGSGGRGRGGSGRRRGRGRERARGGSRERARGRGRGRGEKRPRSPSSQSSSSGSPPRRPP 399

7      PGRRPF FHPVGEADYFEYHQEGGPDGEPDVPPGAIEQGPADDPGEGPSTGPRGQGDGGRRK----- 67
16     PGRRPF FHPVGEADYFEYHQE----- 36
76     PGRRPF FHPVGEADYFEYHQEGGPDGEPDVPPGAIEQGPADDPGEGPSTGPRGQGDGGRRKGGWFGKHRGQGGSNPKFE 155
400    PGRRPF FHPVGEADYFEYHQEGGPDGEPDVPPGAIEQGPADDPGEGPSTGPRGQGDGGRRKGGWFGKHRGQGGSNPKFE 479

-----
-----

156    NIAEGLRALLARSHVERTTDEGTWAGVFVYGGSKTSLYNLRRGTALAIPQCRLTPLSRLPFGMAPGPGPQGPLRESIV 235
480    NIAEGLRALLARSHVERTTDEGTWAGVFVYGGSKTSLYNLRRGTALAIPQCRLTPLSRLPFGMAPGPGPQGPLRESIV 559

```

**Supplementary Figure 2. Amino acid sequence alignment of the EBNA1 (for assays A8, A10, and A11, GenBank accession number: NC\_007605.1).** The sequence alignment was done using Protein BLAST (blast.ncbi.nlm.nih.gov). Red depicts the identical amino acid residues in all the sequences.

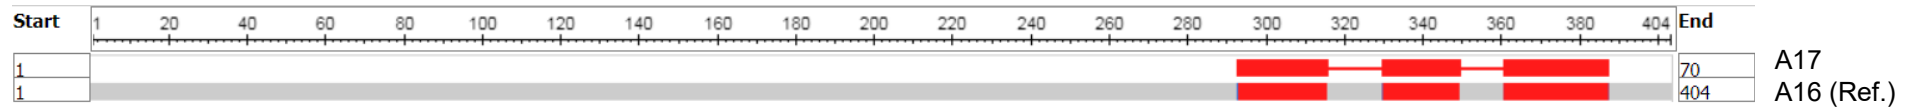

```

1  -----LFNHASEEAAASTASEPEDKSPR----- 23
241 CSVAADSLAAALSLCRIPAVSVPILRFYRSGIIAVVAGLLTSAGDLPLDLSVILFNHASEEAAASTASEPEDKSPRVQPL 320

24  -----TVSPSPSPPPPRTPTWESP-----SHSSNTALERPLAVQLARKRTSSEARQ----- 70
321 GTGLQQRPRHTVSPSPSPPPPRTPTWESPARPETPSPAIPSHSSNTALERPLAVQLARKRTSSEARQKQKHPKKVKQAF 400

```

**Supplementary Figure 3. Amino acid sequence alignment of the EAd (for assays A16 and A17, GenBank accession number: NC\_007605.1).** The sequence alignment was done using Protein BLAST ([blast.ncbi.nlm.nih.gov](http://blast.ncbi.nlm.nih.gov)). Red depicts the identical amino acid residues in all the sequences.

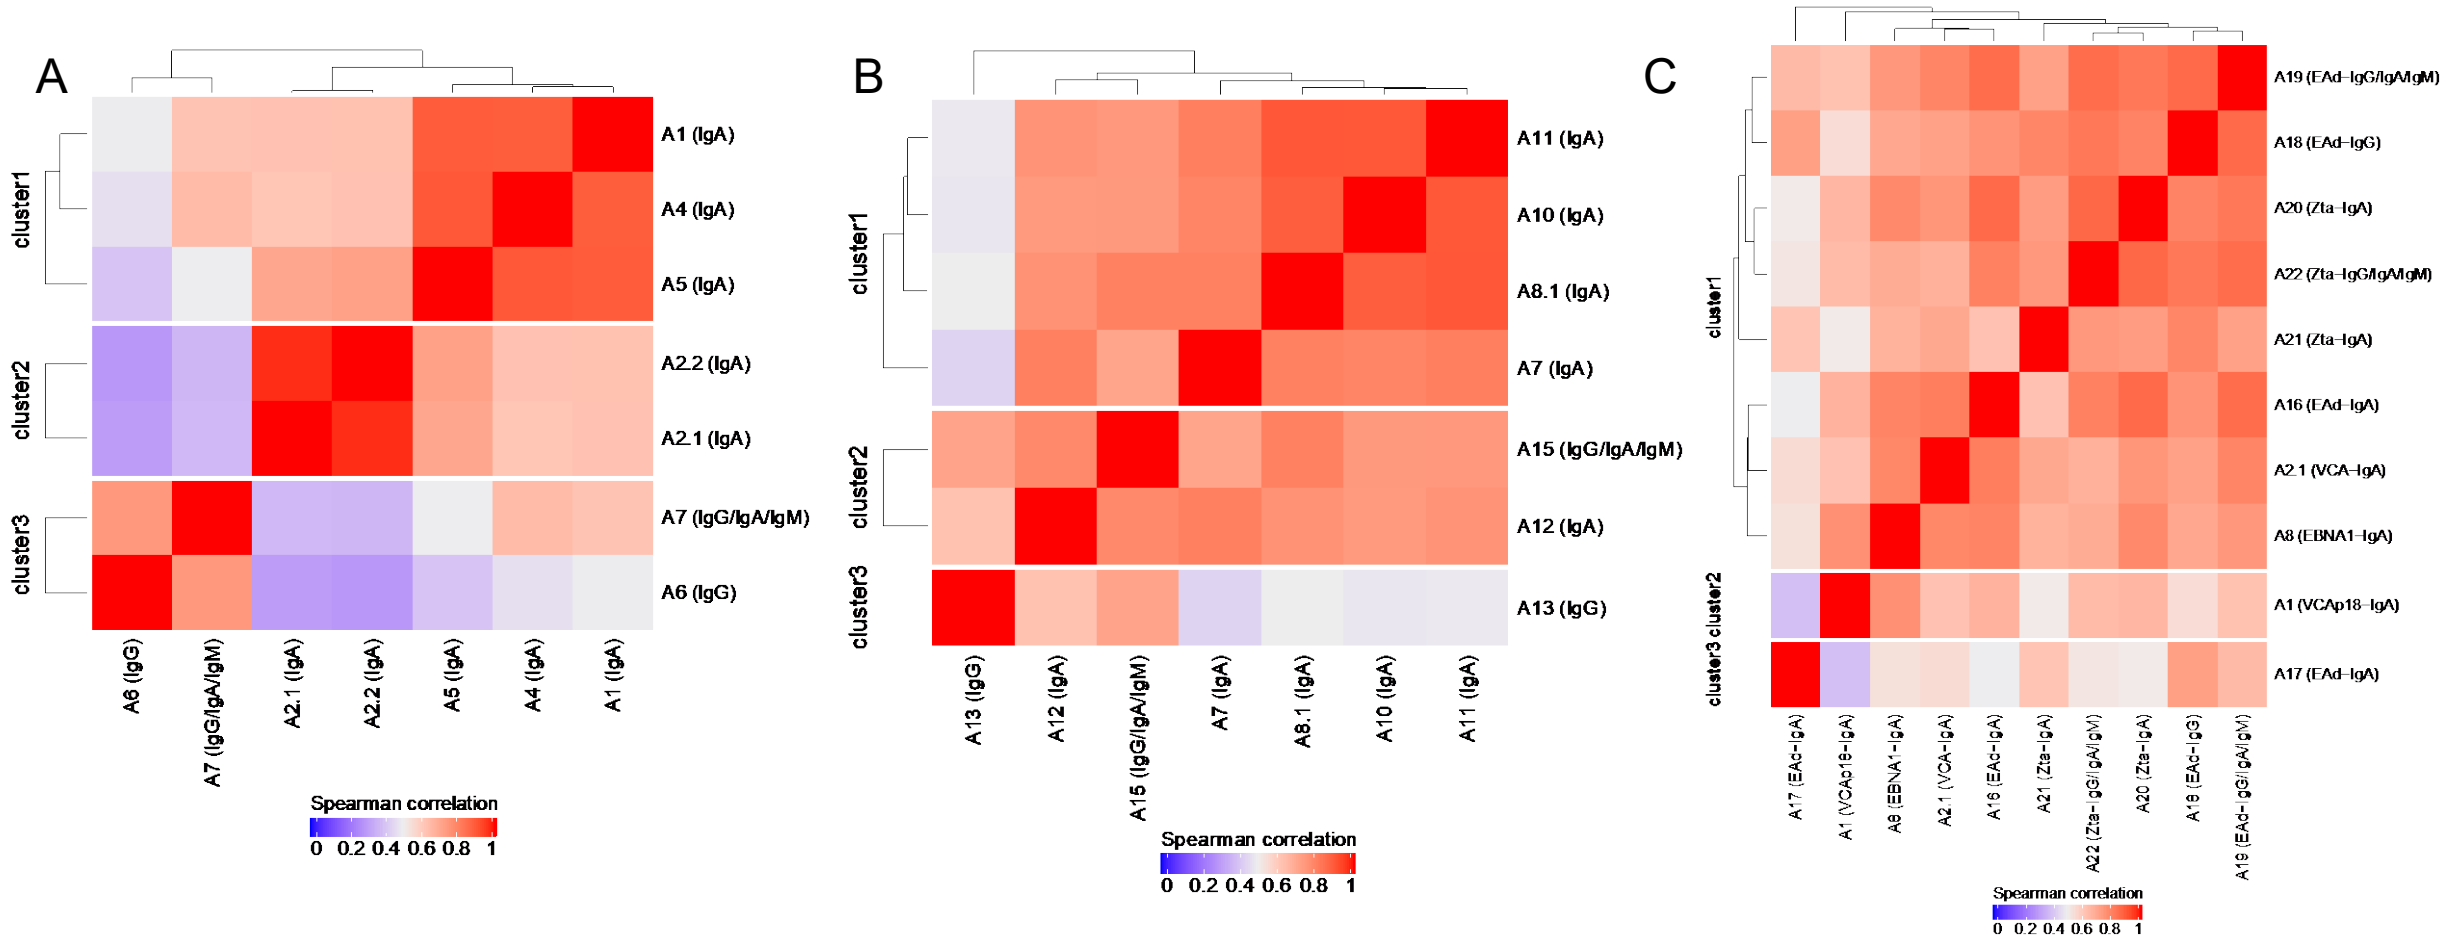

**Supplementary Figure 4.** Unsupervised hierarchical clustering based on Spearman correlation coefficient between assays measuring anti-EBV antibodies in plasma. **A) Antibodies against VCA; B) Antibodies against EBNA1; C) Antibodies against Zta (ZEBRA), EAd, VCA, and EBNA1.** Red depicts a strong positive correlation, and blue indicates a weak correlation.
